# Supplementary material
Source: PubMed Central journal article supplement (PMC5050043)

Supplementary Figure 1

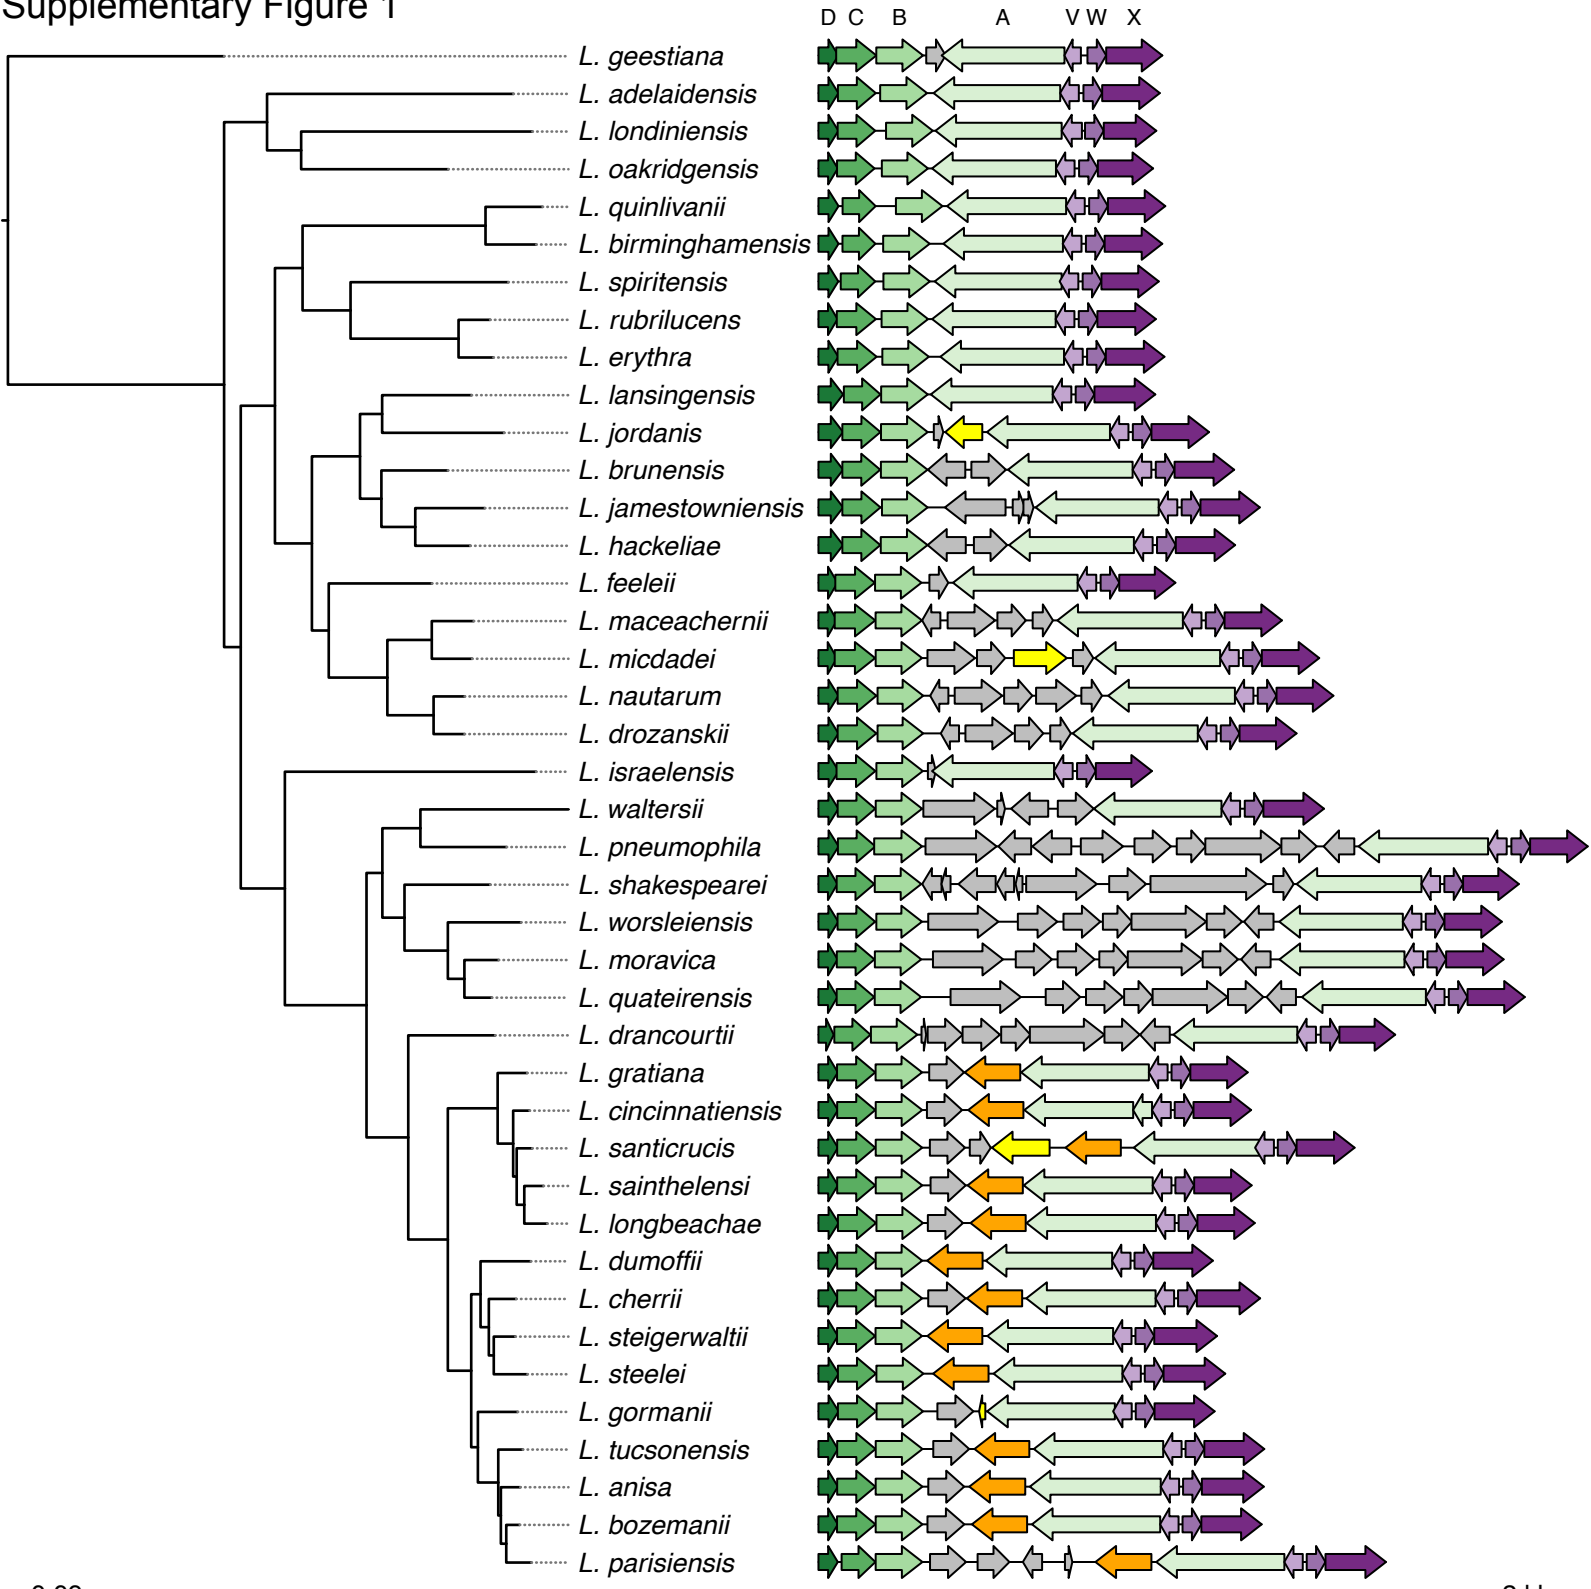

0.09

2 kb

## Supplementary Figure 2

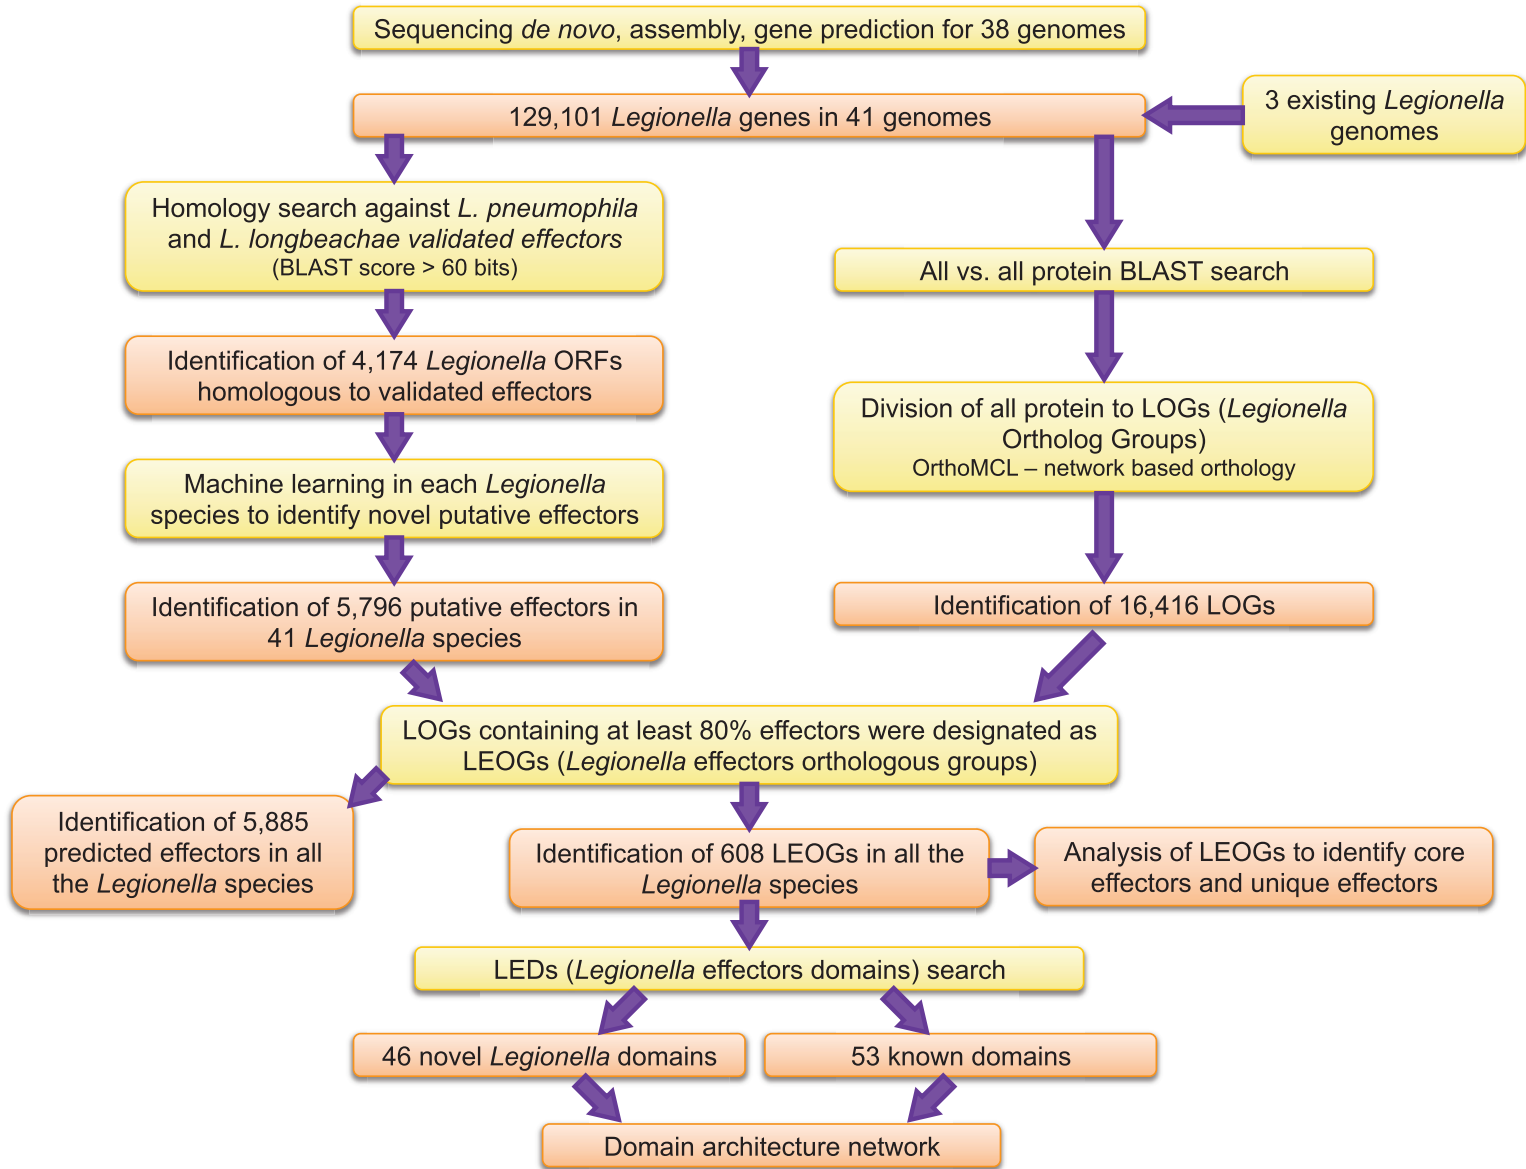

# Supplementary Figure 3

**a**

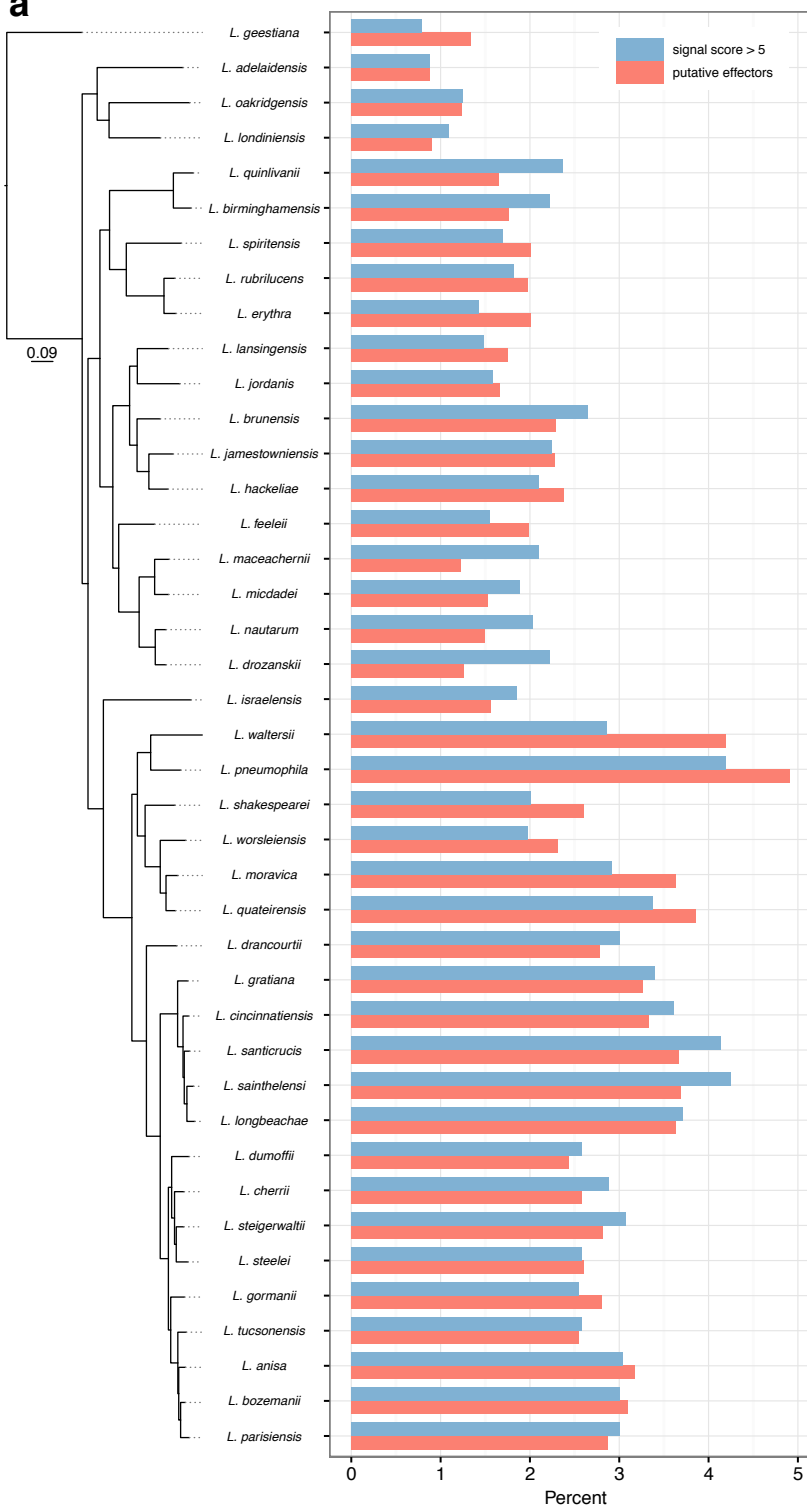

**b**

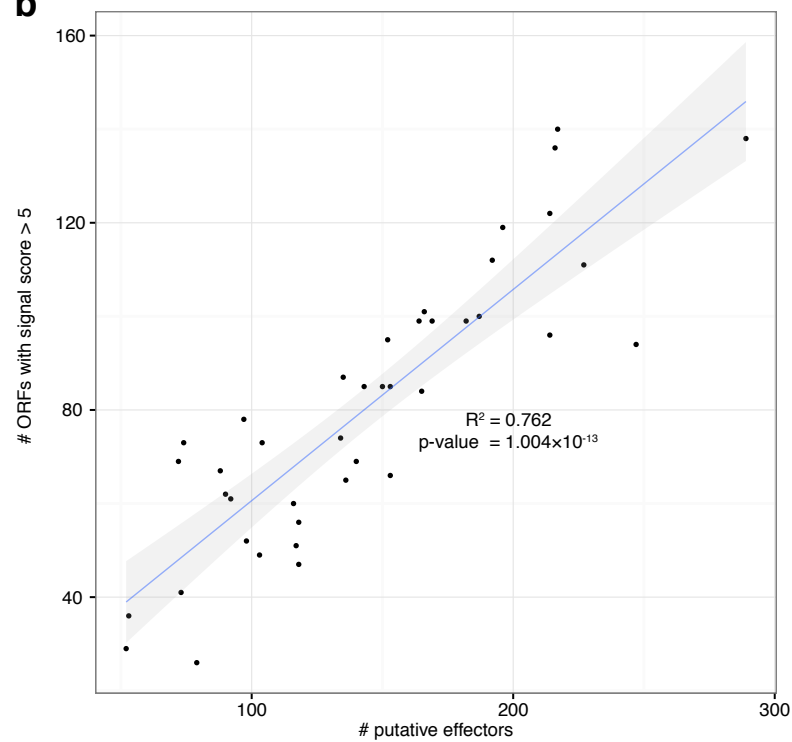

**c**

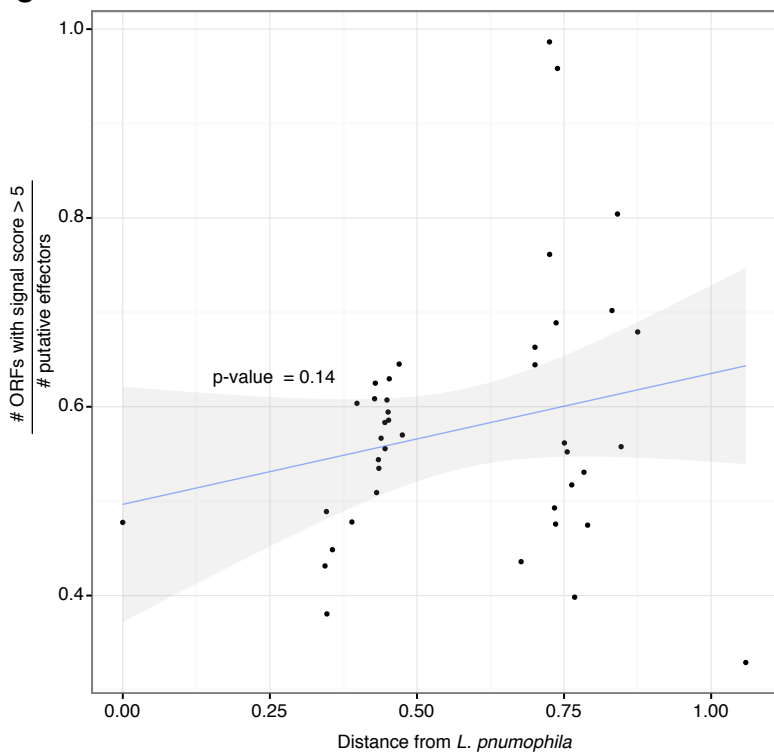

# Supplementary Figure 4

Species tree

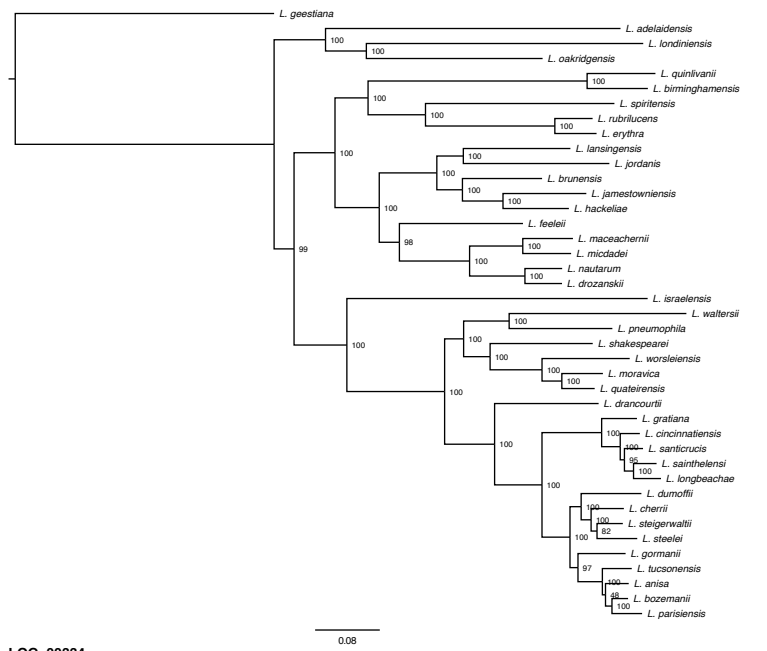

LOG\_00212

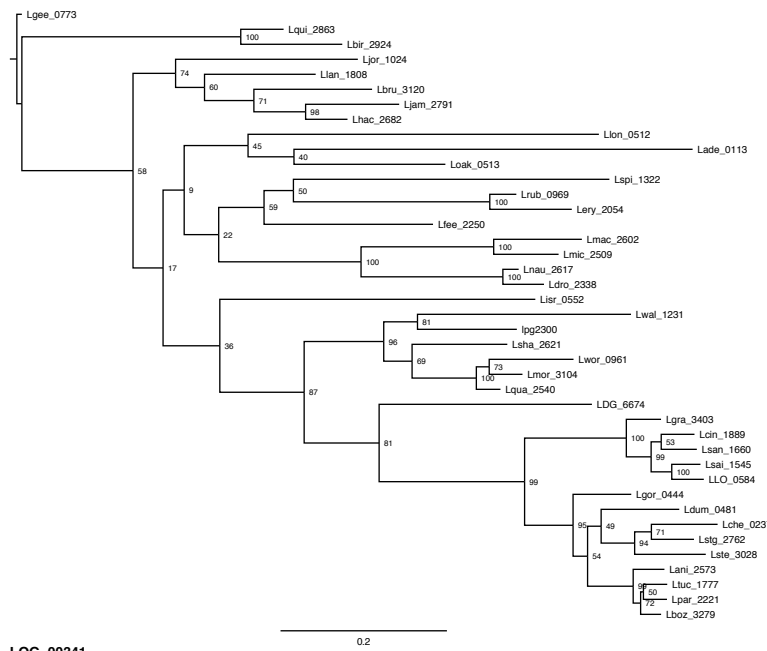

LOG\_00334

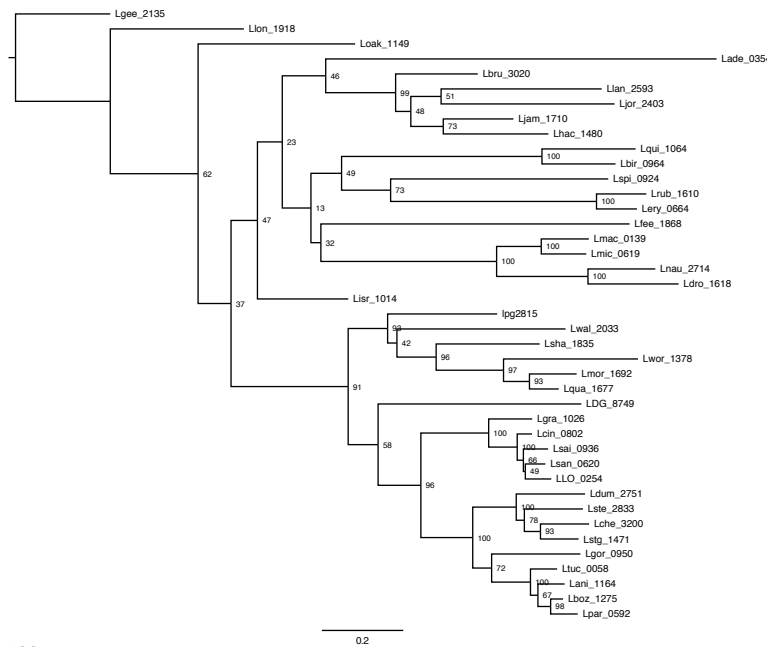

LOG\_00341

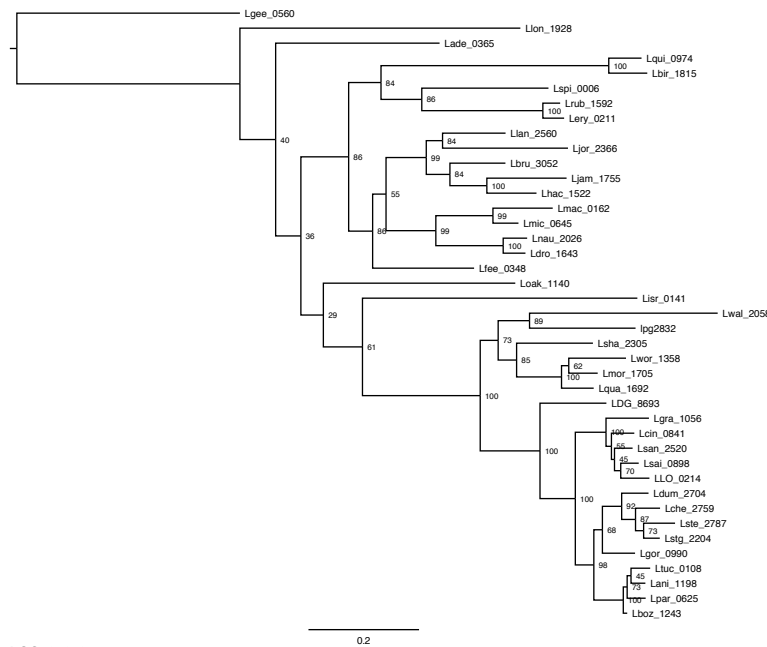

LOG\_1048

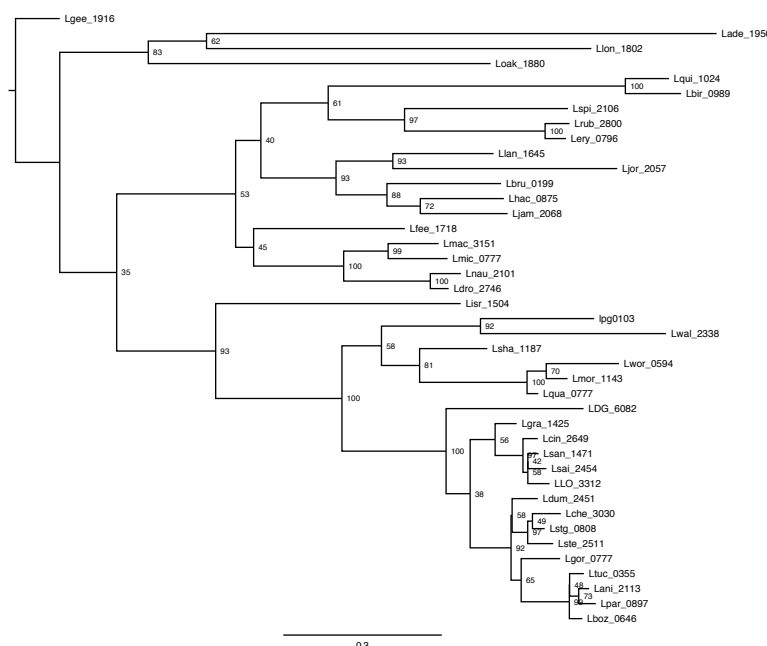

LOG\_01049

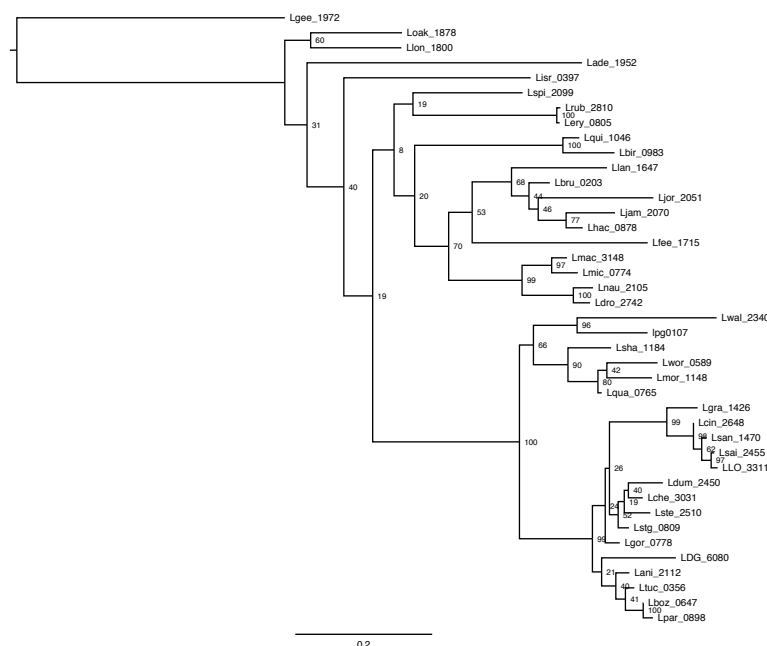

LOG\_01066

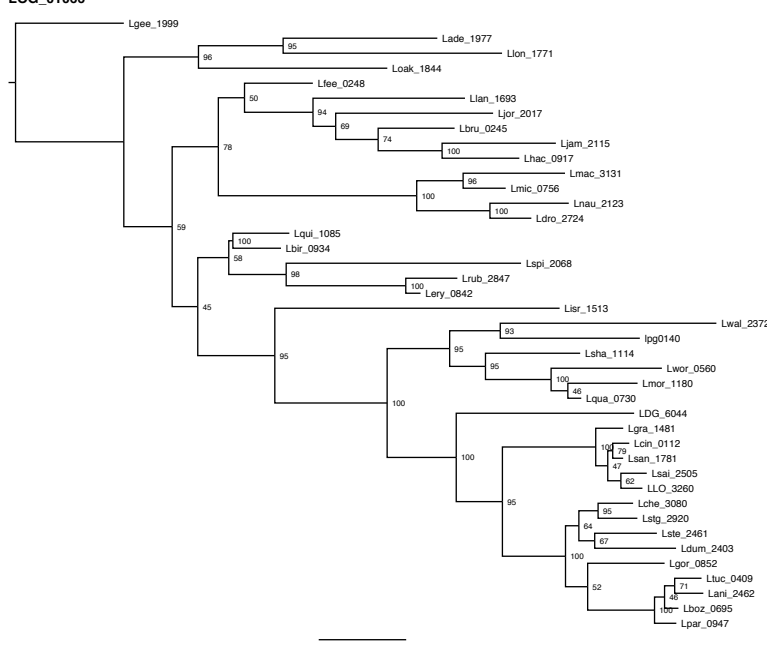

LOG\_01106

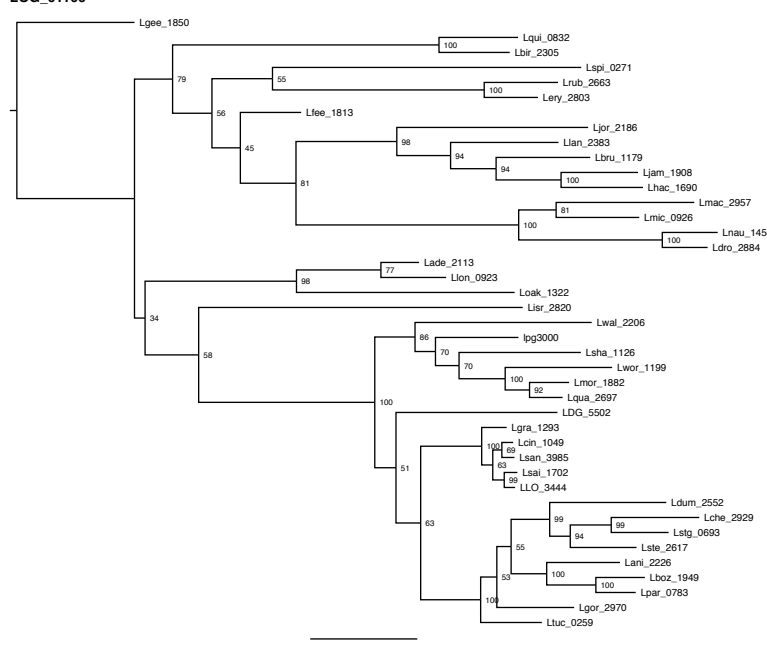

Supplementary Figure 5

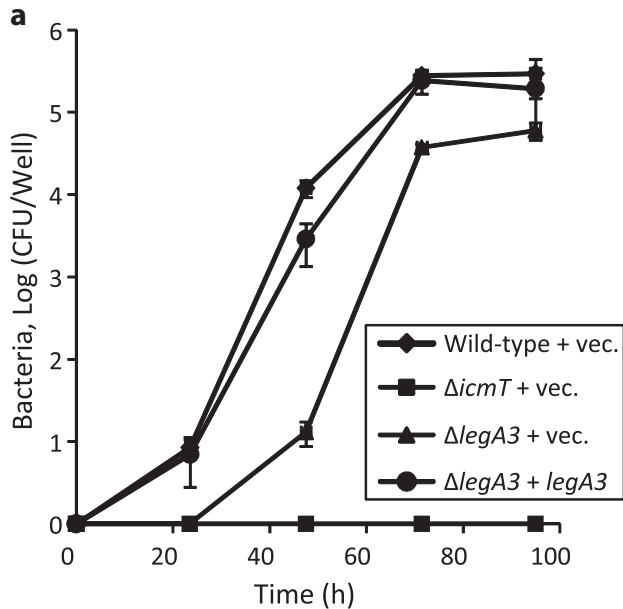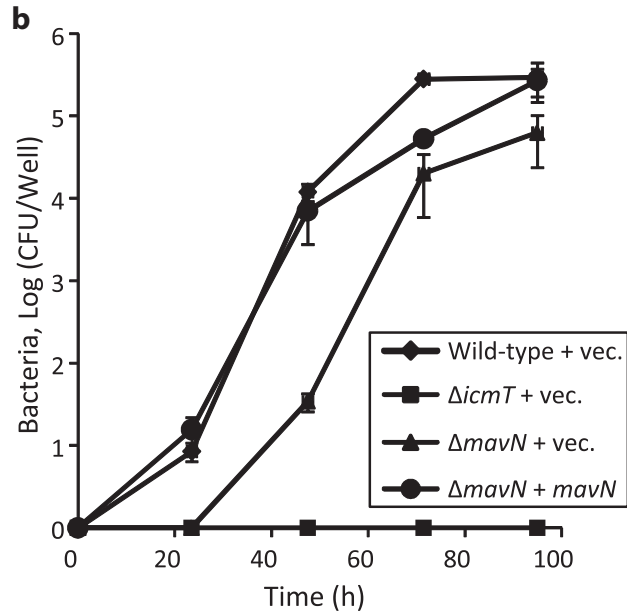

# Supplementary Figure 6

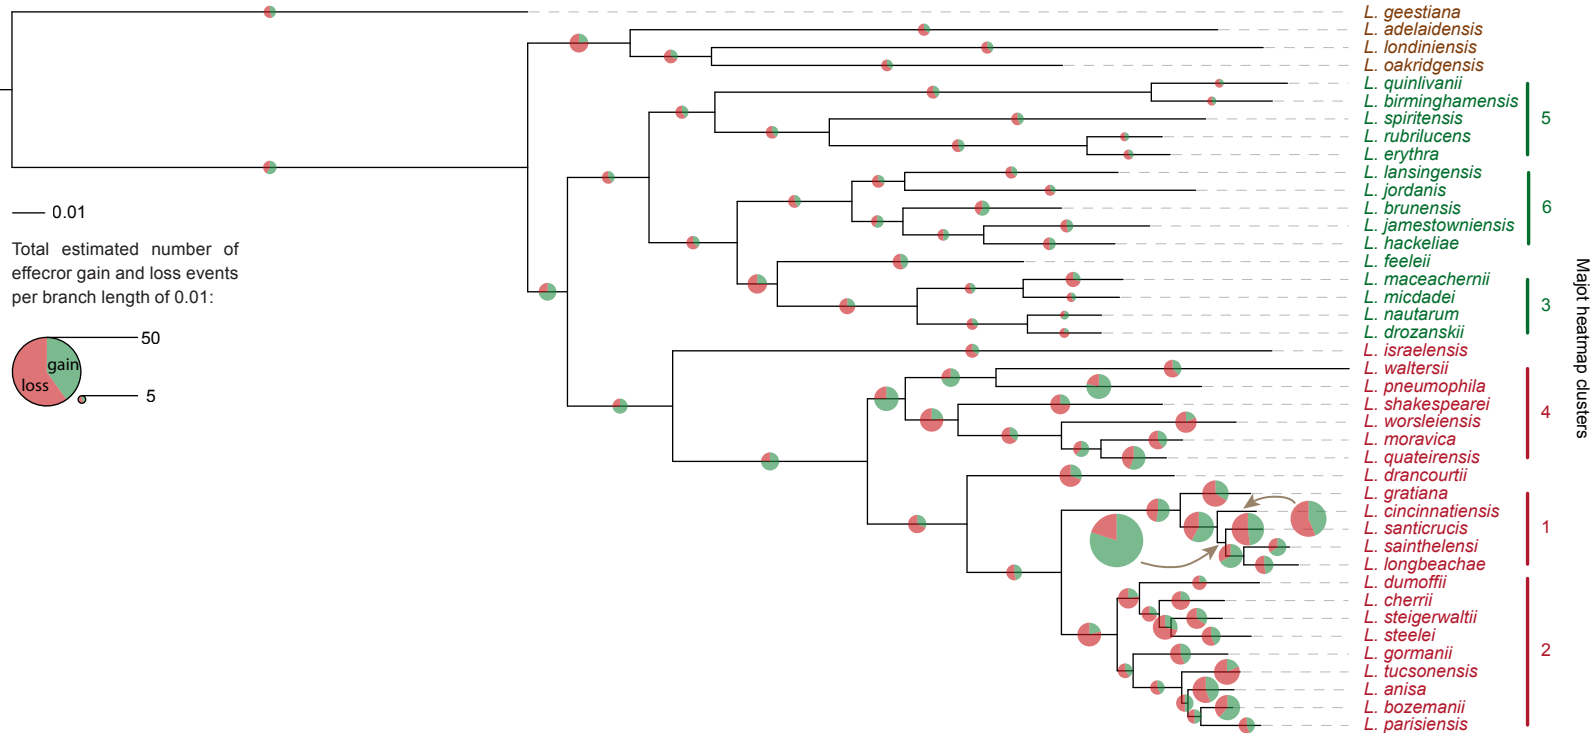

Supplementary Figure 7

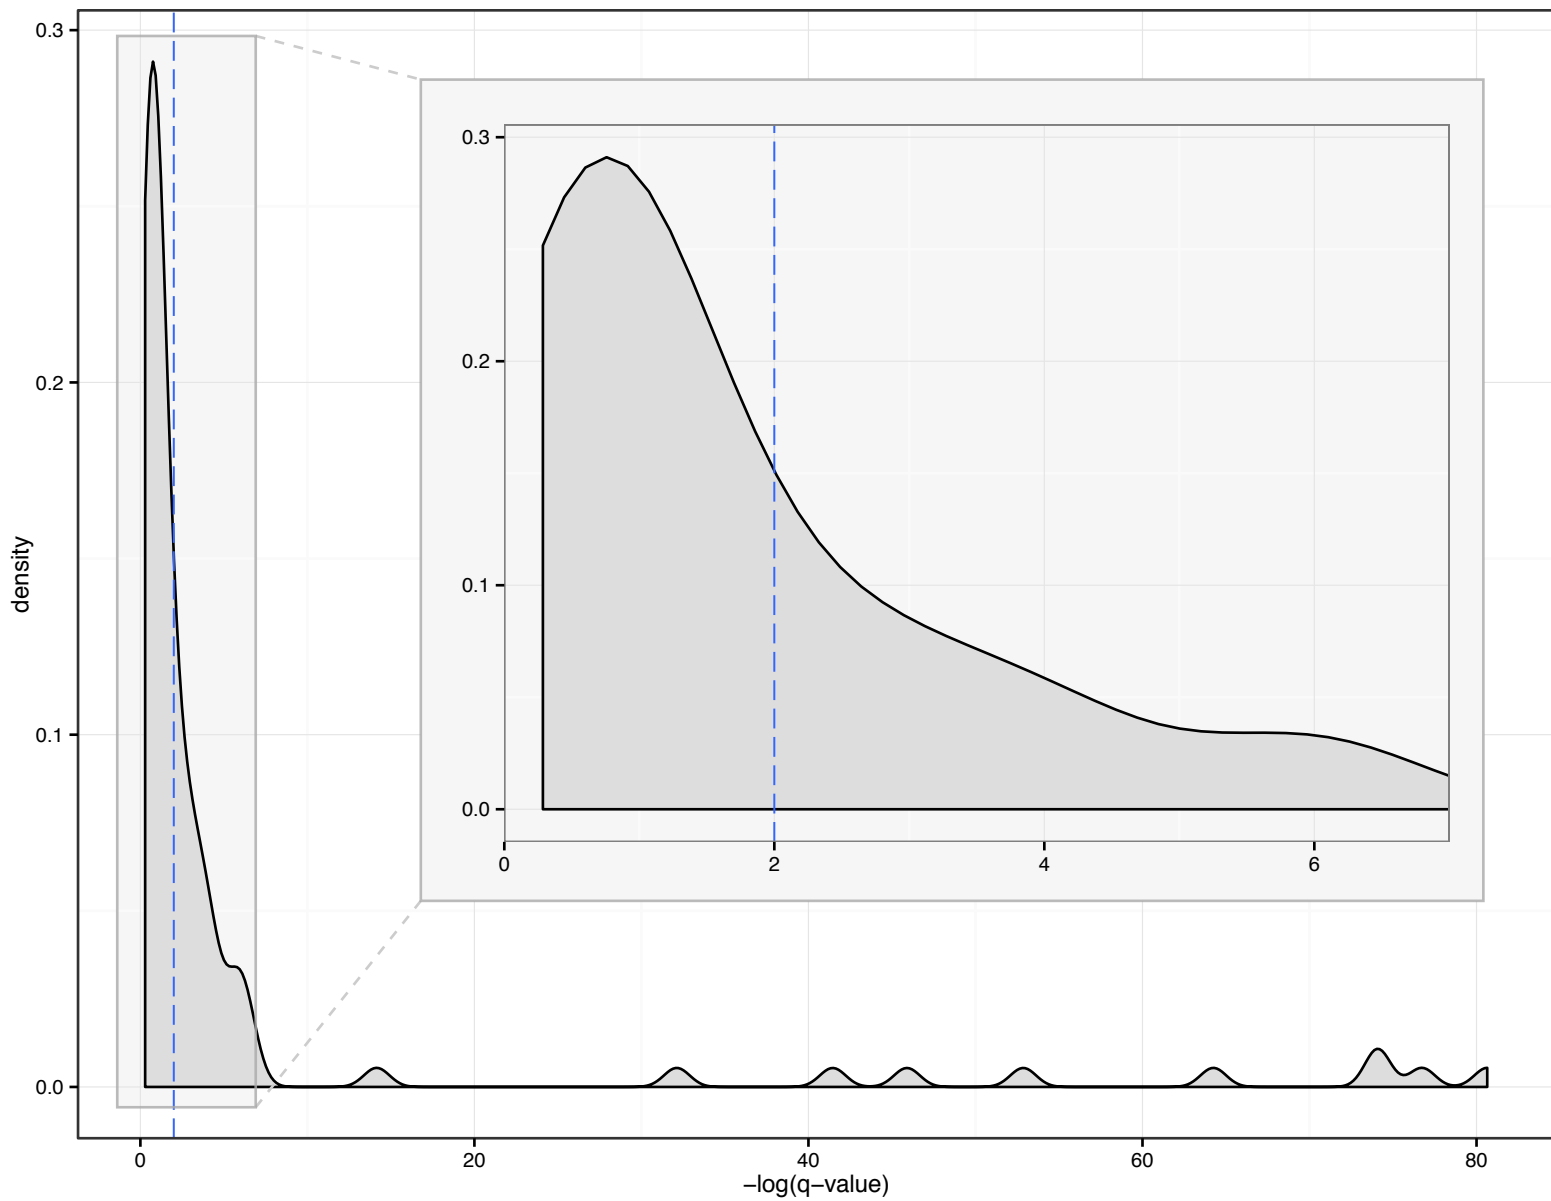

# Supplementary Figure 8

-  PI4P-binding
-  LED006
-  LED022
-  Glycosyltransferase
-  Protein Tyrosine Kinase
-  Serine/Threonine Kinase
-  Haloacid dehalogenase-like
-  Ankyrin repeats
-  Leucine-rich repeats
-  U-box
-  Decarboxylase
-  J-domain
-  Src homology 2
-  Cysteine peptidase
-  LED010
-  LED043
-  LED058
-  LED073

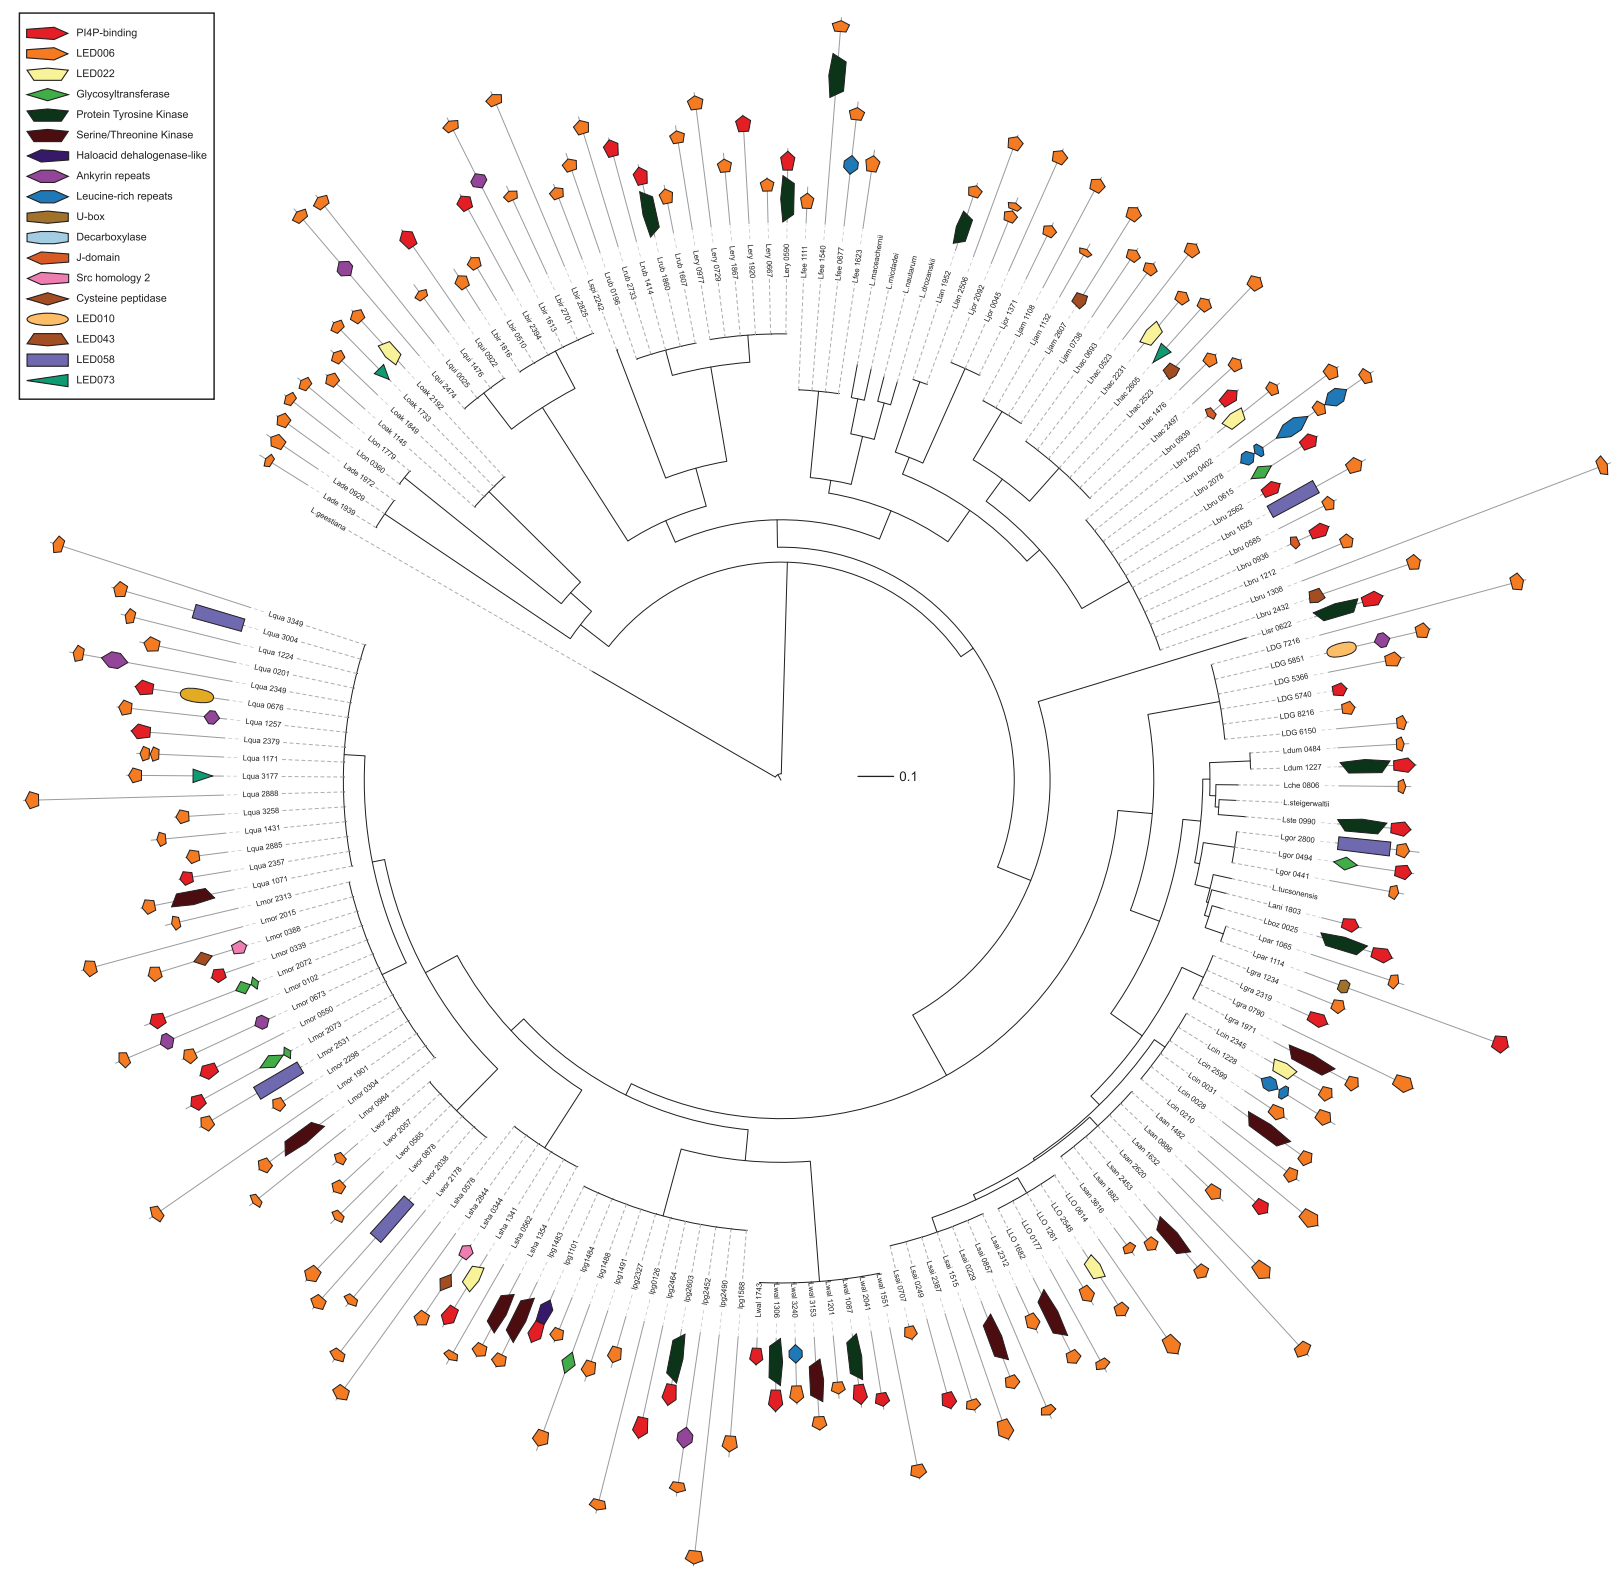



# Supplementary Figure 9

-  Ankyrin repeats
-  Fic
-  LED047
-  F-box
-  Leucine-rich repeats
-  LED023
-  Cysteine peptidase
-  LED006
-  LED010
-  LED025
-  LED027
-  Patatin-like phospholipase
-  Glycosyltransferase
-  LED020
-  Putative methyl transferase
-  LED019
-  LED064
-  LED029
-  LED060
-  LED057

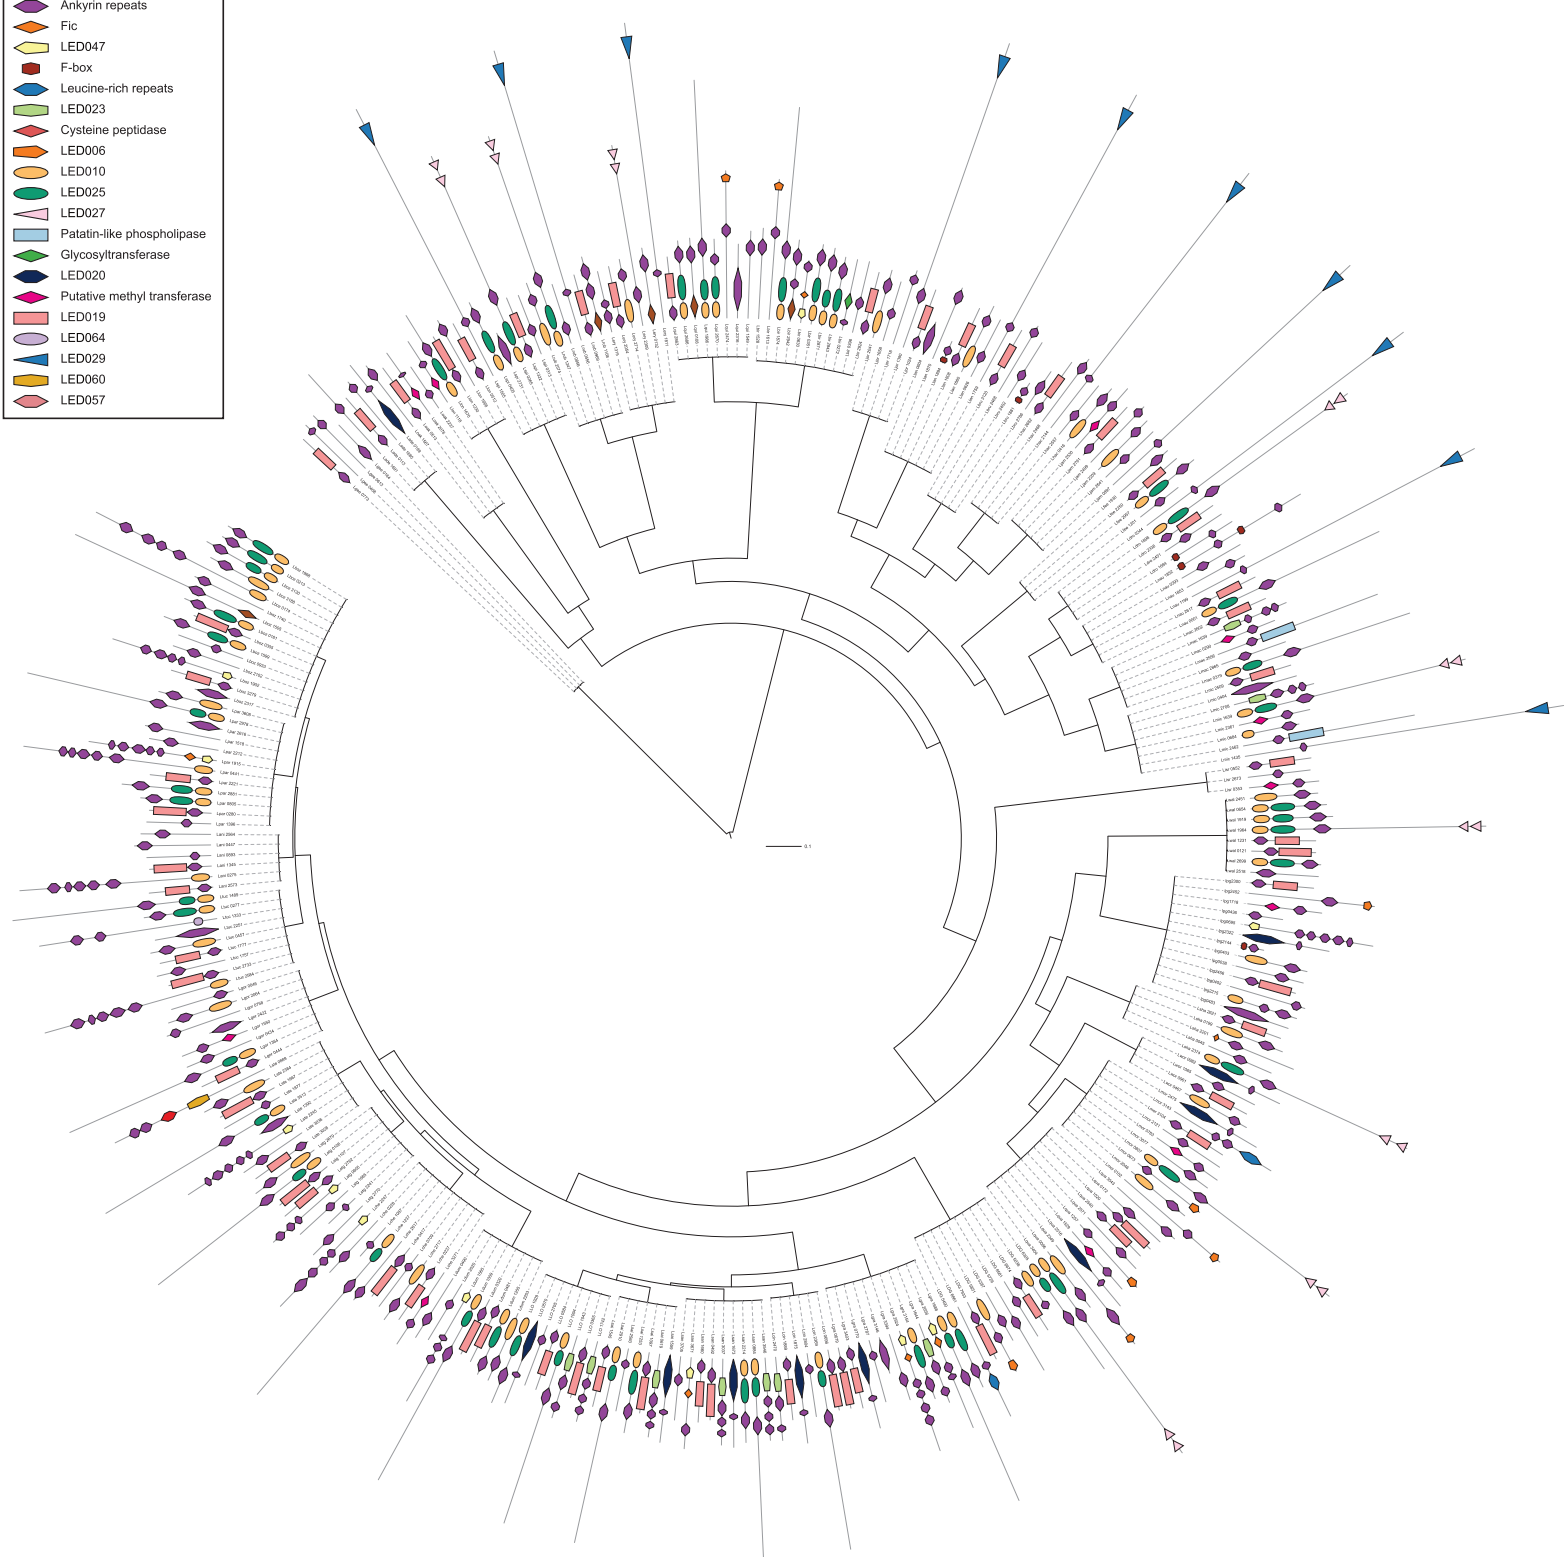

Supplement: NIHMS817051-supplement-Supplemental_Figures_1-9.pdf [file NIHMS817051-supplement-Supplemental_Figures_1-9.pdf]
